# Supplementary material for: What Predicts Adherence to Governmental COVID-19 Measures among Danish Students?
Source: MDPI journal article supplement (doi:10.3390/ijerph18041822), 2021-02-13
Supplement: s1 [file s1]

Supplementary Table S1: Questions and answers used in the present analysis derived from the questionnaire of the international student wellbeing survey. For further information please read [16].

| Question                                                                                                                                                                                | Answer categories                                                                                                                                                                                                                                                                                                   |
|-----------------------------------------------------------------------------------------------------------------------------------------------------------------------------------------|---------------------------------------------------------------------------------------------------------------------------------------------------------------------------------------------------------------------------------------------------------------------------------------------------------------------|
| Your gender is                                                                                                                                                                          | Male; Female; Other                                                                                                                                                                                                                                                                                                 |
| Your age is                                                                                                                                                                             | [given in years]                                                                                                                                                                                                                                                                                                    |
| Are you currently in a steady relationship?                                                                                                                                             | no, I am single; Yes; It is complicated                                                                                                                                                                                                                                                                             |
| Are you born in Denmark                                                                                                                                                                 | Yes; No                                                                                                                                                                                                                                                                                                             |
| What is the highest level of education your mother has completed?                                                                                                                       | Less than secondary education; Secondary education (high school); Higher education; Do not know                                                                                                                                                                                                                     |
| Indicate which of the following best describes your field of study?                                                                                                                     | Country specific categorization was used                                                                                                                                                                                                                                                                            |
| In which study program are you currently enrolled?                                                                                                                                      | Bachelor program; Master program; Doctoral program; Other, please specify                                                                                                                                                                                                                                           |
| At which higher-education institution are you currently enrolled?                                                                                                                       | Country specific list was used                                                                                                                                                                                                                                                                                      |
| To what extent do you agree with the following statement?<br>'I had sufficient financial resources to cover my monthly costs'<br>Before the COVID outbreak:                             | Strongly agree; Agree; Neither agree nor disagree; Disagree; Strongly disagree                                                                                                                                                                                                                                      |
| Where did you mainly live (excluding weekends and holidays)?<br>Before the COVID outbreak:                                                                                              | I stayed with my parent(s); I stayed in a student hall of the university/college; a boarding home or a dormitory; I rented an accommodation with others; I rented an accommodation by myself; Other                                                                                                                 |
| On average, how often did you smoke tobacco (cigarettes or cigars)?<br>Before the COVID outbreak:                                                                                       | (Almost) never; Less than once a week; Once a week; More than once a week; (Almost) daily; Prefer not to say                                                                                                                                                                                                        |
| On average, how many glasses of alcohol did you drink in one week?<br>Before the COVID outbreak:                                                                                        | [number of glasses]                                                                                                                                                                                                                                                                                                 |
| On average, how often did you perform vigorous physical activities like lifting heavy things, running, aerobics, or fast cycling for at least 30 minutes?<br>Before the COVID outbreak: | (Almost) never; Less than once a week; Once a week; More than once a week; (Almost) daily                                                                                                                                                                                                                           |
| Do you have any of the following underlying conditions?<br>(multiple options are possible)                                                                                              | Heart disease; Lung disease (including moderate or severe asthma); Kidney disease; Diabetes; High blood pressure; Immunocompromised conditions (e.g., bone marrow or organ transplantation, HIV, prolonged use of corticosteroids); A recent cancer diagnosis; Obesity; None of these conditions; Prefer not to say |
| Did you have COVID-19, or do you currently have it?                                                                                                                                     | Yes, confirmed by a lab test; Yes, a health care provider told me that I probably had/have it, but a lab test did not confirm it; I think I had or currently have COVID-19, but a health care provider did not confirm it; No, I do not think I had or currently have it                                            |
| How worried are you ...<br>... to get infected with COVID-19?                                                                                                                           | "Not worried at all" until "Very worried" in a score from 0 to 10                                                                                                                                                                                                                                                   |
| Do you know anyone on your personal network that was or currently is infected with COVID-19?                                                                                            | Yes or No                                                                                                                                                                                                                                                                                                           |

| Question                                                                                                                                                                            | Answer categories                                                                                  |
|-------------------------------------------------------------------------------------------------------------------------------------------------------------------------------------|----------------------------------------------------------------------------------------------------|
| To what degree do you adhere to the COVID-19 measures that are currently implemented by the government?                                                                             | "Totally not" to "Very strictly" in a score from 0 to 10                                           |
| Please indicate how much of the time during the past week...                                                                                                                        | None or almost none of the time; Some of the time; Most of the time; All or almost all of the time |
| ...you felt depressed (a)                                                                                                                                                           | Depression scale – CES-D (Radloff et al. 1991)                                                     |
| ...you felt that everything you did was an effort (b)                                                                                                                               |                                                                                                    |
| ...your sleep was restless (c)                                                                                                                                                      |                                                                                                    |
| ...you were happy (d)                                                                                                                                                               |                                                                                                    |
| ...you felt lonely (e)                                                                                                                                                              |                                                                                                    |
| ...you enjoyed life (f)                                                                                                                                                             |                                                                                                    |
| ...you felt sad (g)                                                                                                                                                                 |                                                                                                    |
| ...you could not get going (h)                                                                                                                                                      |                                                                                                    |
| ...you were bored (i)                                                                                                                                                               |                                                                                                    |
| ...you were frustrated with things in general (j)                                                                                                                                   |                                                                                                    |
| ...you felt anxious (k)                                                                                                                                                             |                                                                                                    |
| ...you felt calm and peaceful (l)                                                                                                                                                   |                                                                                                    |
| ...you lacked companionship (m)                                                                                                                                                     |                                                                                                    |
| ...felt isolated from others (n)                                                                                                                                                    |                                                                                                    |
| Please indicate which of the following statements are true or false:                                                                                                                | True; False; Don't know                                                                            |
| (a) The virus survives for days outside the body in the open air                                                                                                                    |                                                                                                    |
| (b) The virus survives for a week outside the body on a plastic surface.                                                                                                            |                                                                                                    |
| (c) Most people who get COVID-19 get very ill.                                                                                                                                      |                                                                                                    |
| (d) A possible vaccine will take around 12 to 18 months to produce.                                                                                                                 |                                                                                                    |
| (e) Smokers who get COVID-19 are more likely to get ill than non-smokers.                                                                                                           |                                                                                                    |
| (f) You can have the virus without any symptoms.                                                                                                                                    |                                                                                                    |
| (g) On average, children get less ill from the virus than adults.                                                                                                                   |                                                                                                    |
| (h) Only elderly people die from COVID-19.                                                                                                                                          |                                                                                                    |
| The questions in this scale ask you about your feelings and thoughts during the last month. In each case, please indicate with a check how often you felt or thought a certain way. | Never; Almost never; sometimes; Fairly often; Very often                                           |
| 1. How often have you felt that you were unable to control the important things in your life?                                                                                       | Short form of Cohen's perceived stress scale (Cohen et al. 1983)                                   |
| 2. How often have you felt confident about your ability to handle your personal problems?                                                                                           |                                                                                                    |
| 3. How often have you felt that things were going your way?                                                                                                                         |                                                                                                    |
| 4. How often have you felt difficulties were piling up so high that you could not overcome them?                                                                                    |                                                                                                    |
